# Supplementary material for: SDF-1alpha concentration dependent modulation of RhoA and Rac1 modifies breast cancer and stromal cells interaction
Source: Springer Nature journal article supplement (doi:10.1186/s12885-015-1556-7), 2015-07-31

# Supplementary Figure 1

**A**

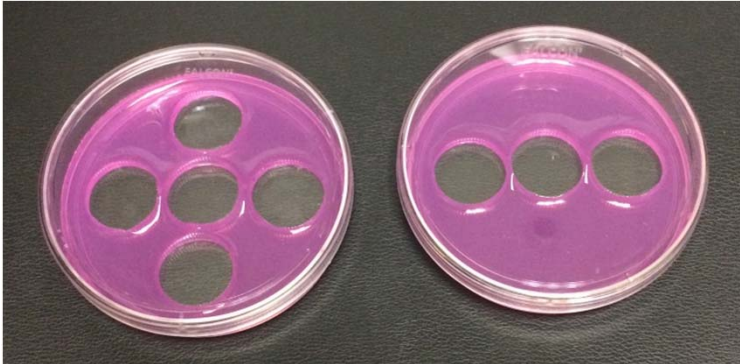

**B**

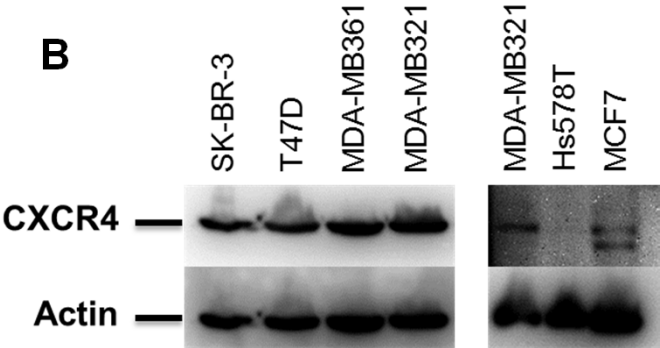

**C**

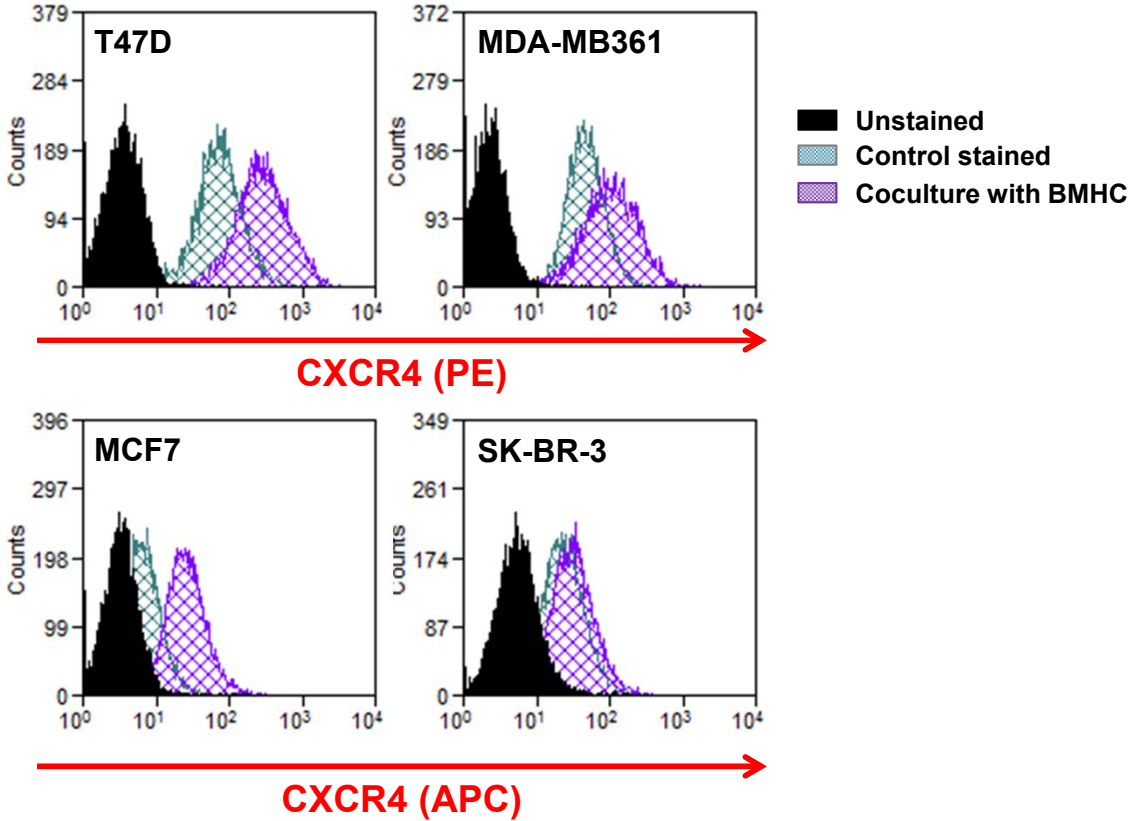

# Supplementary Figure 2

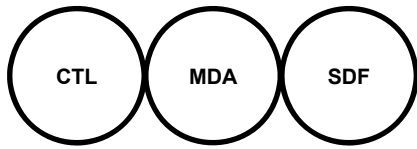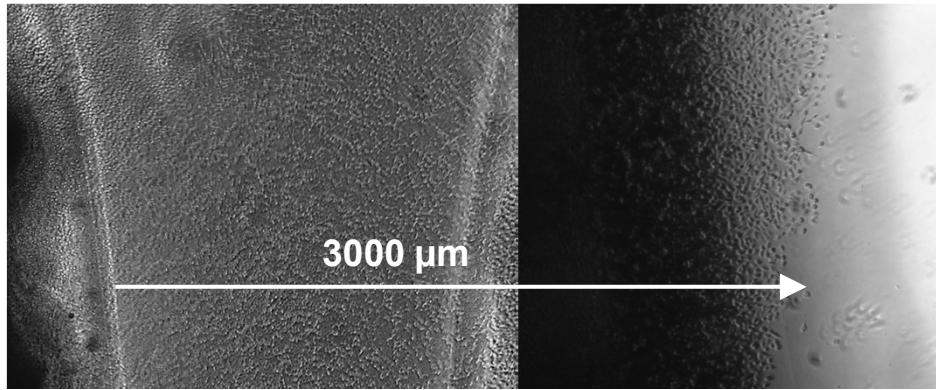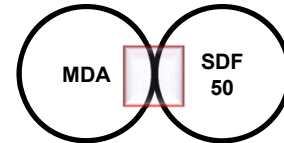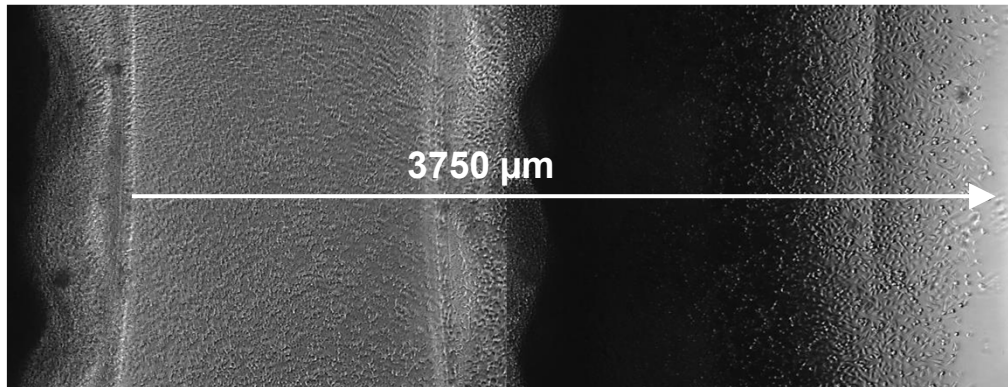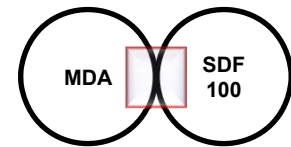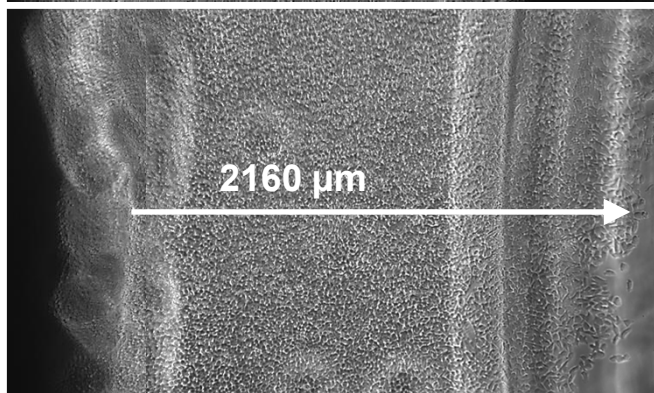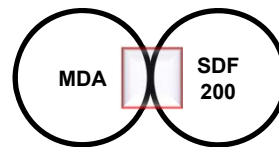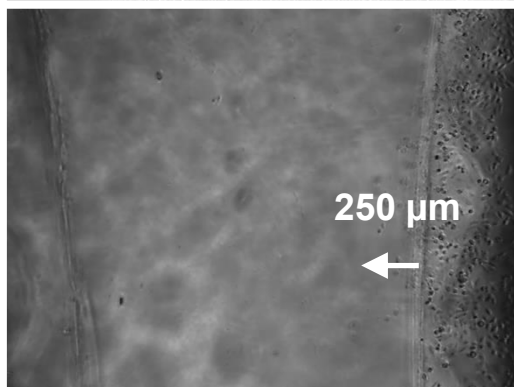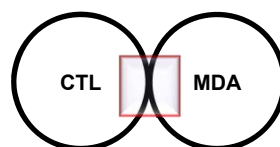

# Supplementary Figure 3

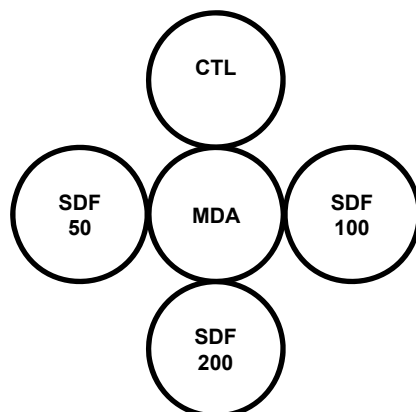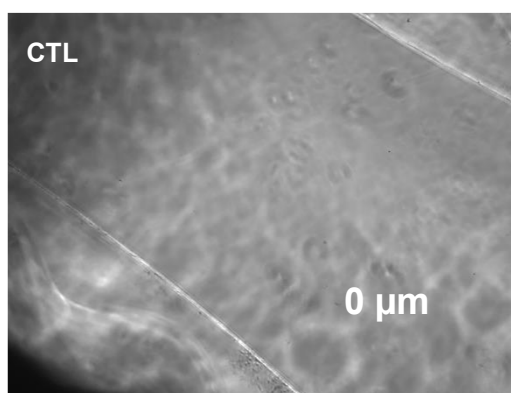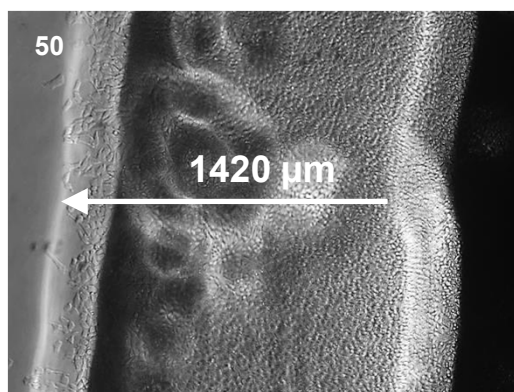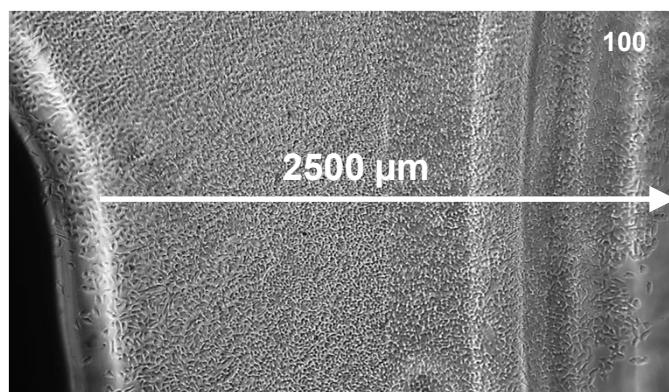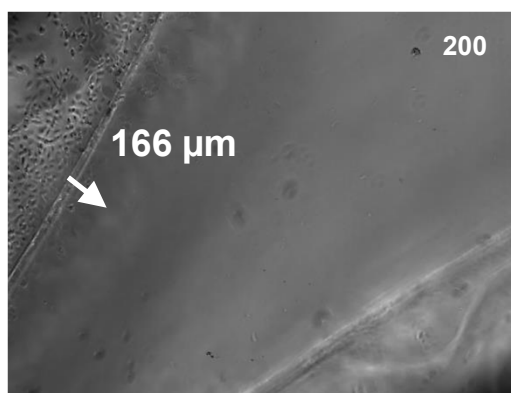

# Supplementary Figure 4

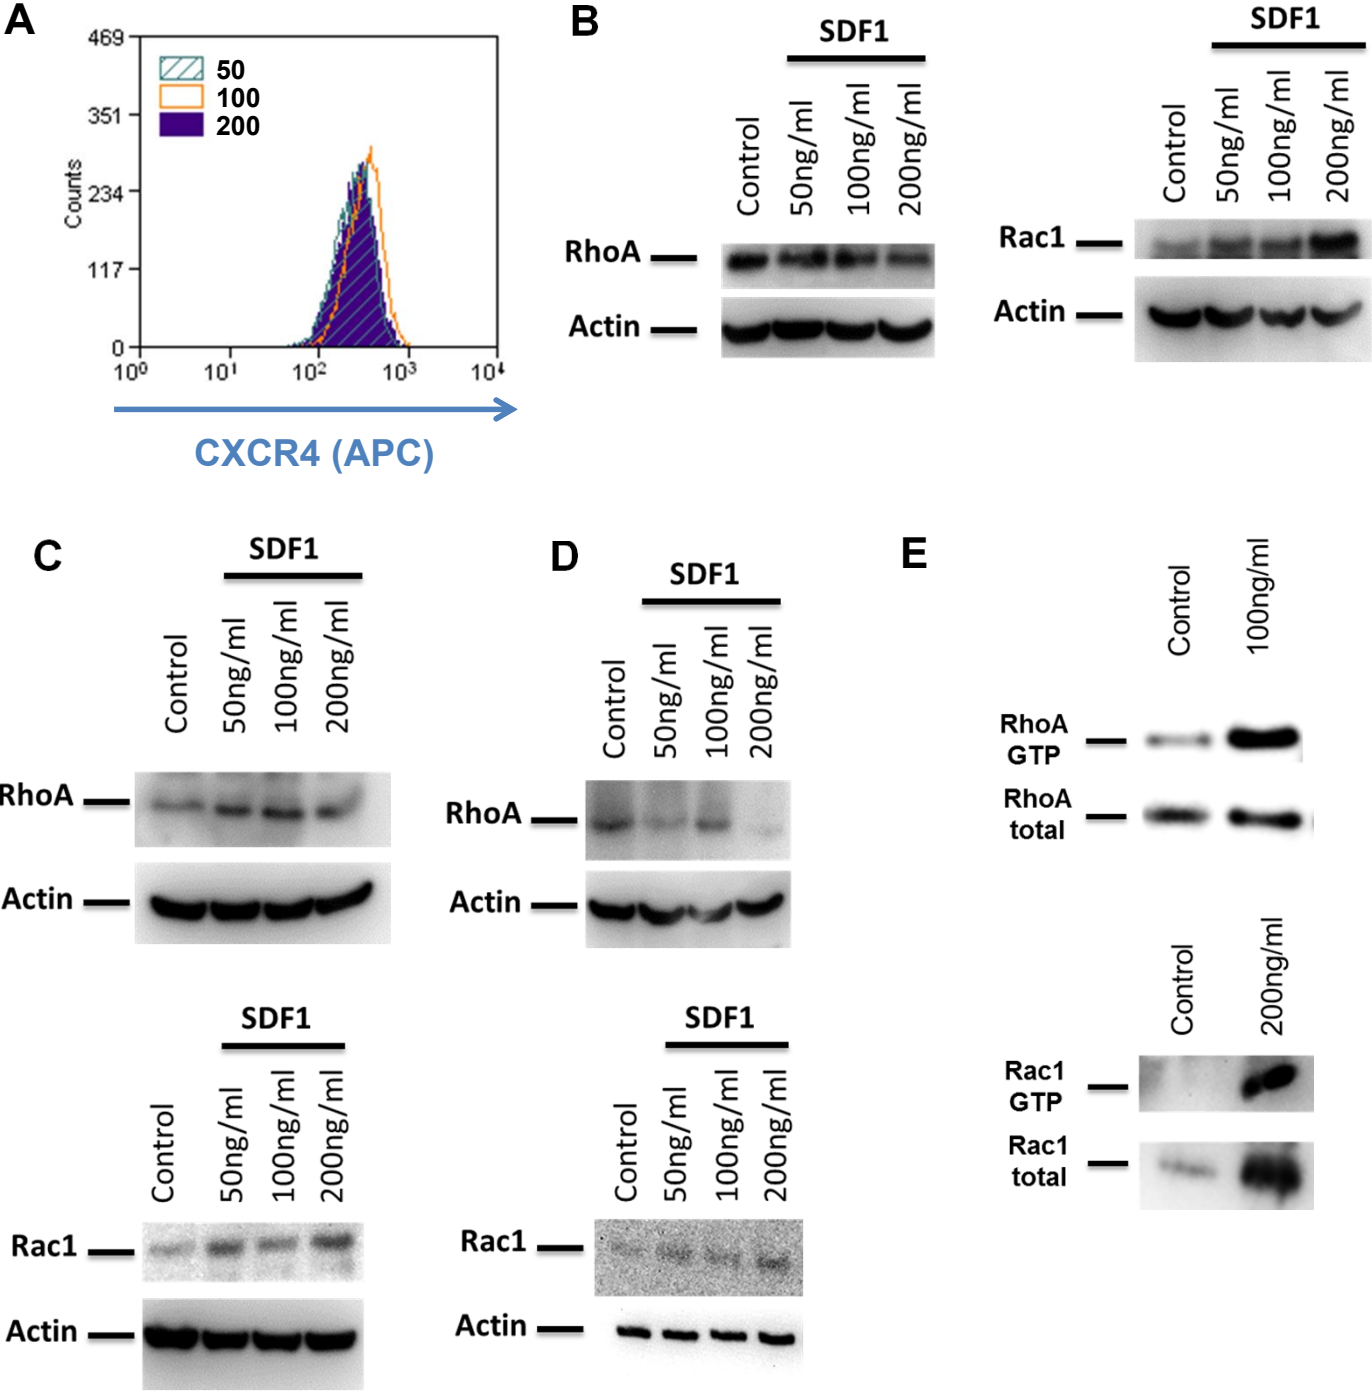

# Supplementary Figure 5

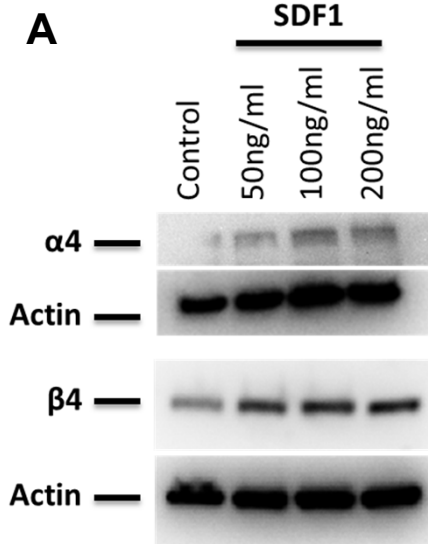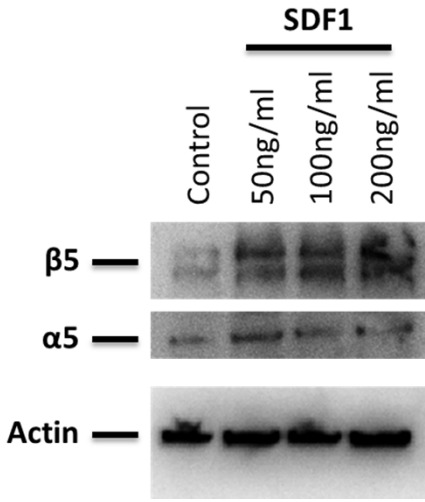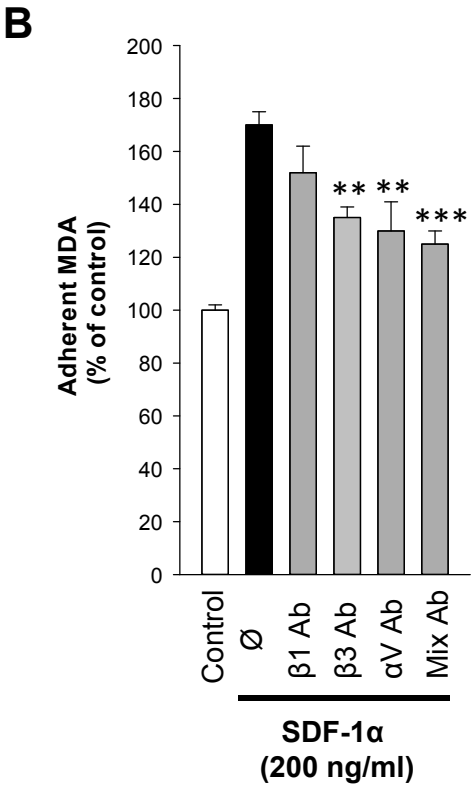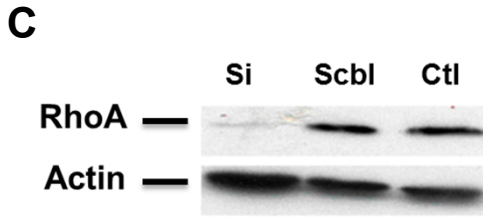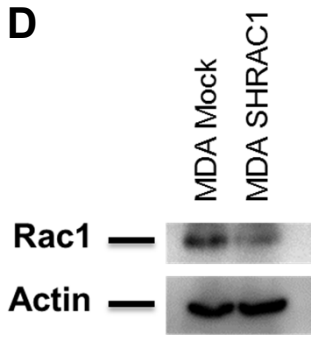

Supplement: MOESM1 [file 9744894]
